# Supplementary material for: Seasonal Dynamics and Spatial Distribution of Aedes albopictus (Diptera: Culicidae) in a Temperate Region in Europe, Southern Portugal
Source: MDPI journal article supplement (doi:10.3390/ijerph17197083), 2020-09-27
Supplement: s1 [file s1]

**Table S1.** Collection sites and GPS locations for ovitraps and BG-sentinel traps.

| Program       | Trap     | Code       | X            | Y            |
|---------------|----------|------------|--------------|--------------|
| PRALGARVE_BGS | BGS      | PALVIL_BGS | 37°05'36.7"N | 8°05'49.2"W  |
| PRALGARVE_BGS | BGS      | QTRBGS_17  | 37°04'39.1"N | 8°05'03.9"W  |
| PRALGARVE_BGS | BGS      | VGBGS_1    | 37°02'35.9"N | 8°02'34.8"W  |
| PRALGARVE_BGS | BGS      | VGBGS_4    | 37°02'39.7"N | 8°02'34.0"W  |
| PRALGARVE_BGS | BGS      | VGBGS_7    | 37°02'42.9"N | 8°02'41.3"W  |
| PRALGARVE_BGS | BGS      | VGBGS_8    | 37°02'43.0"N | 8°02'28.4"W  |
| PRALGARVE_BGS | BGS      | VSP_BGS    | 37°05'29.7"N | 08°05'47.4"W |
| PRALGARVE_BGS | BGS      | VSP_BGS2   | 37°05'34.6"N | 8°05'45.9"W  |
| PRALGARVE_OV  | Ovitraps | PALVIL_OV  | 37°05'36.7"N | 8°05'49.2"W  |
| PRALGARVE_OV  | Ovitraps | PALVIL_OV6 | 37°05'32.1"N | 8°05'52.1"W  |
| PRALGARVE_OV  | Ovitraps | QTROV_17   | 37°04'39.1"N | 8°05'03.9"W  |
| PRALGARVE_OV  | Ovitraps | QTROV_29   | 37°04'54.9"N | 8°05'01.5"W  |
| PRALGARVE_OV  | Ovitraps | QTROV_30   | 37°04'36.3"N | 8°05'16.4"W  |
| PRALGARVE_OV  | Ovitraps | QTROV_31   | 37°04'48.0"N | 8°05'14.4"W  |
| PRALGARVE_OV  | Ovitraps | QTROV_32   | 37°04'23.4"N | 8°05'00.7"W  |
| PRALGARVE_OV  | Ovitraps | QTROV_33   | 37°04'16.7"N | 8°04'58.8"W  |
| PRALGARVE_OV  | Ovitraps | VGOV_1     | 37°02'35.9"N | 8°02'34.8"W  |
| PRALGARVE_OV  | Ovitraps | VGOV_10    | 37°02'49.5"N | 8°02'24.2"W  |
| PRALGARVE_OV  | Ovitraps | VGOV_11    | 37°02'40.7"N | 8°02'58.1"W  |
| PRALGARVE_OV  | Ovitraps | VGOV_12    | 37°02'41.1"N | 8°03'03.7"W  |
| PRALGARVE_OV  | Ovitraps | VGOV_13    | 37°02'26.4"N | 8°02'59.1"W  |
| PRALGARVE_OV  | Ovitraps | VGOV_14    | 37°02'15.7"N | 8°02'16.0"W  |
| PRALGARVE_OV  | Ovitraps | VGOV_15    | 37°02'31.1"N | 8°02'11.7"W  |
| PRALGARVE_OV  | Ovitraps | VGOV_16    | 37°02'35.8"N | 8°02'37.0"W  |
| PRALGARVE_OV  | Ovitraps | VGOV_18    | 37°03'39.6"N | 8°02'33.4"W  |
| PRALGARVE_OV  | Ovitraps | VGOV_19    | 37°02'50.4"N | 8°02'12.9"W  |
| PRALGARVE_OV  | Ovitraps | VGOV_2     | 37°02'35.8"N | 8°02'35.0"W  |
| PRALGARVE_OV  | Ovitraps | VGOV_20    | 37°02'48.6"N | 8°02'04.6"W  |
| PRALGARVE_OV  | Ovitraps | VGOV_21    | 37°02'31.0"N | 8°01'56.2"W  |

|              |         |         |              |              |
|--------------|---------|---------|--------------|--------------|
| PRALGARVE_OV | Ovitrap | VGOV_22 | 37°02'16.8"N | 8°02'10.1"W  |
| PRALGARVE_OV | Ovitrap | VGOV_23 | 37°02'26.4"N | 8°02'11.2"W  |
| PRALGARVE_OV | Ovitrap | VGOV_24 | 37°02'55.2"N | 8°02'58.2"W  |
| PRALGARVE_OV | Ovitrap | VGOV_25 | 37°03'03.6"N | 8°03'04.8"W  |
| PRALGARVE_OV | Ovitrap | VGOV_26 | 37°03'10.0"N | 8°03'14.0"W  |
| PRALGARVE_OV | Ovitrap | VGOV_27 | 37°03'04.5"N | 8°03'25.2"W  |
| PRALGARVE_OV | Ovitrap | VGOV_28 | 37°03'22.2"N | 8°03'32.0"W  |
| PRALGARVE_OV | Ovitrap | VGOV_3  | 37°02'35.8"N | 8°02'33.7"W  |
| PRALGARVE_OV | Ovitrap | VGOV_5  | 37°02'43.5"N | 8°02'32.8"W  |
| PRALGARVE_OV | Ovitrap | VGOV_6  | 37°02'40.8"N | 8°02'33.8"W  |
| PRALGARVE_OV | Ovitrap | VGOV_7  | 37°02'42.9"N | 8°02'41.3"W  |
| PRALGARVE_OV | Ovitrap | VGOV_8  | 37°02'43.1"N | 8°02'27.3"W  |
| PRALGARVE_OV | Ovitrap | VGOV_9  | 37°02'46.9"N | 8°02'47.5"W  |
| PRALGARVE_OV | Ovitrap | VSP_OV  | 37°05'29.7"N | 08°05'47.4"W |
| PRALGARVE_OV | Ovitrap | VSP_OV2 | 37°05'34.6"N | 8°05'45.9"W  |

**Table S2.** Local average minimum and maximum temperatures and number of mosquitoes per month.

|              | Average temperatures |         |         |          |             |           |            |
|--------------|----------------------|---------|---------|----------|-------------|-----------|------------|
|              | Min T°C              | Max T°C | Average | Eggs (N) | Females (N) | Males (N) | Adults (N) |
| January 2019 | 4,5                  | 15,3    | 9,9     |          |             |           | 0          |
| February     | 4                    | 17      | 10,5    |          |             |           | 0          |
| March        | 9,3                  | 20      | 14,65   |          |             |           | 0          |
| April        | 11,2                 | 20,9    | 16,05   |          |             |           | 0          |
| May          | 13,7                 | 26,2    | 19,95   |          | 1           |           | 1          |
| June         | 13,9                 | 23,6    | 18,75   |          | 1           |           | 1          |
| July         | 16,9                 | 29,2    | 23,05   | 1075     | 32          | 18        | 50         |
| August       | 18,7                 | 29,5    | 24,1    | 4056     | 39          | 27        | 66         |
| September    | 20                   | 28,2    | 24,1    | 6949     | 38          | 26        | 64         |
| October      | 15,6                 | 23,3    | 19,45   | 4708     | 66          | 25        | 91         |
| November     | 10,4                 | 18,2    | 14,3    | 2131     | 74          | 9         | 83         |
| December     | 11,4                 | 18,1    | 14,75   | 85       | 3           |           | 3          |

|              |     |      |       |  |  |  |   |
|--------------|-----|------|-------|--|--|--|---|
| January 2020 | 9,2 | 16,7 | 12,95 |  |  |  | 0 |
|--------------|-----|------|-------|--|--|--|---|
